# Supplementary material for: Giant piezoelectricity and ferroelectricity in two-dimensional ThOTe monolayers
Source: Royal Society of Chemistry journal article supplement (doi:10.1039/d4tc01885k), 2024-01-01
Supplement: d4tc01885k1.pdf [file d4tc01885k1.pdf]

## Supporting Information for

### Giant piezoelectricity and ferroelectricity in two-dimensional ThOTe monolayer

Hongbo Zhao<sup>a</sup>, Wei Tan<sup>a</sup>, Na Ren<sup>a</sup>, Longhua Ding<sup>a</sup>, Xin Yu<sup>a</sup>, Aizhu Wang<sup>a\*</sup>, Jingyang Peng<sup>b\*</sup>,  
Mingwen Zhao<sup>c\*</sup> and Hong Liu<sup>a, d\*</sup>

<sup>a</sup>*Institute for Advanced Interdisciplinary Research (iAIR), School of Chemistry and Chemical Engineering, University of Jinan, Jinan, Shandong, 250022, China*

<sup>b</sup>*Institute of Photonic Chips, University of Shanghai for Science and Technology, Shanghai, 200093, China*

<sup>c</sup>*School of Physics and State Key Laboratory of Crystal Materials, Shandong University, Jinan, Shandong, 250100, China*

<sup>d</sup>*State Key Laboratory of Crystal Materials, Shandong University, Jinan, Shandong, 250100, China*

### Corresponding Author:

\*E-mail:

[ifc\\_wangaz@ujn.edu.cn](mailto:ifc_wangaz@ujn.edu.cn); [jingyangpeng@usst.edu.cn](mailto:jingyangpeng@usst.edu.cn); [zmw@sdu.edu.cn](mailto:zmw@sdu.edu.cn); [hongliu@sdu.edu.cn](mailto:hongliu@sdu.edu.cn)

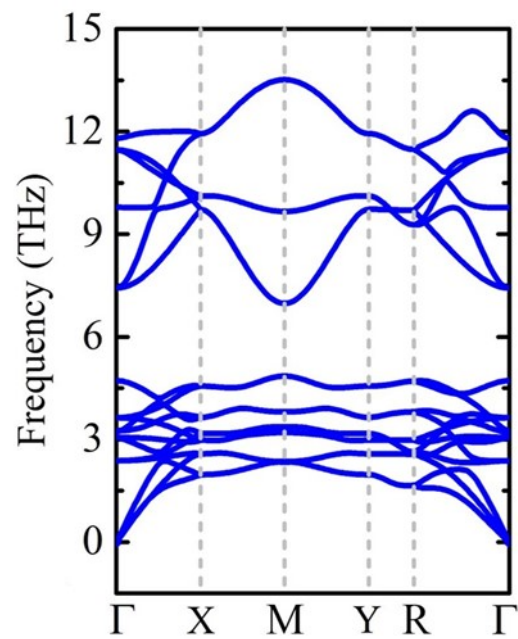

**Figure S1** Phonon spectrum of ThOTe along the high symmetric points in BZ.

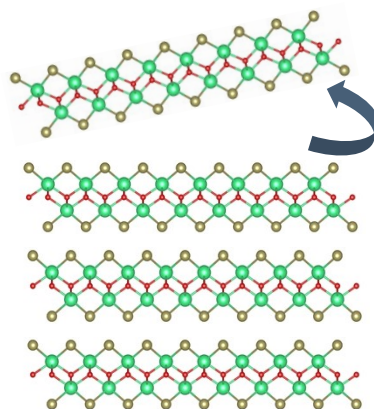

**Figure S2** Schematic diagram of ThOTe monolayer exfoliation process.

We calculated the bulk modulus and shear modulus using the following formulate,

$$K^V = \frac{C_{11} + C_{22} + 2C_{12}}{4},$$

$$G^V = \frac{C_{11} + C_{22} - 2C_{12} + 4C_{66}}{8},$$

$$K^R = \frac{1}{S_{11} + S_{22} + 2S_{12}},$$

$$G^R = \frac{2}{S_{11} + S_{22} - 2S_{12} + S_{66}},$$

$$G^H = \frac{G^V + G^R}{2},$$

$$K^H = \frac{B^V + B^R}{2}$$

According to Hill, the arithmetic mean of the Voight and Reuss values can be used as an estimate of the mean shear modulus and mean bulk modulus, K and G and their ratios are shown in Table 1.

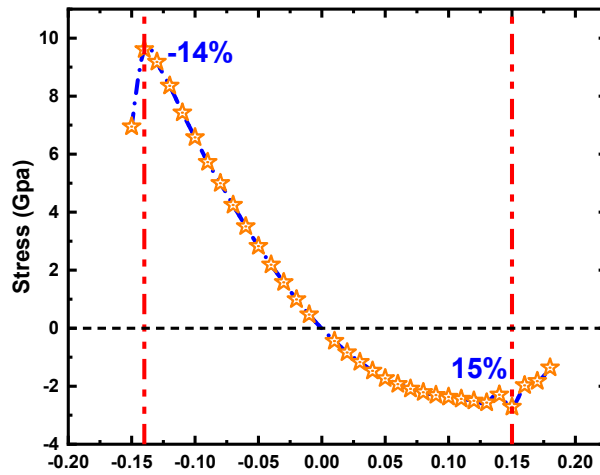

**Figure S3** Stress-strain curves in the ThOTe monolayer, the black dashed line corresponds to the magnitude of the strain when the stress is zero.

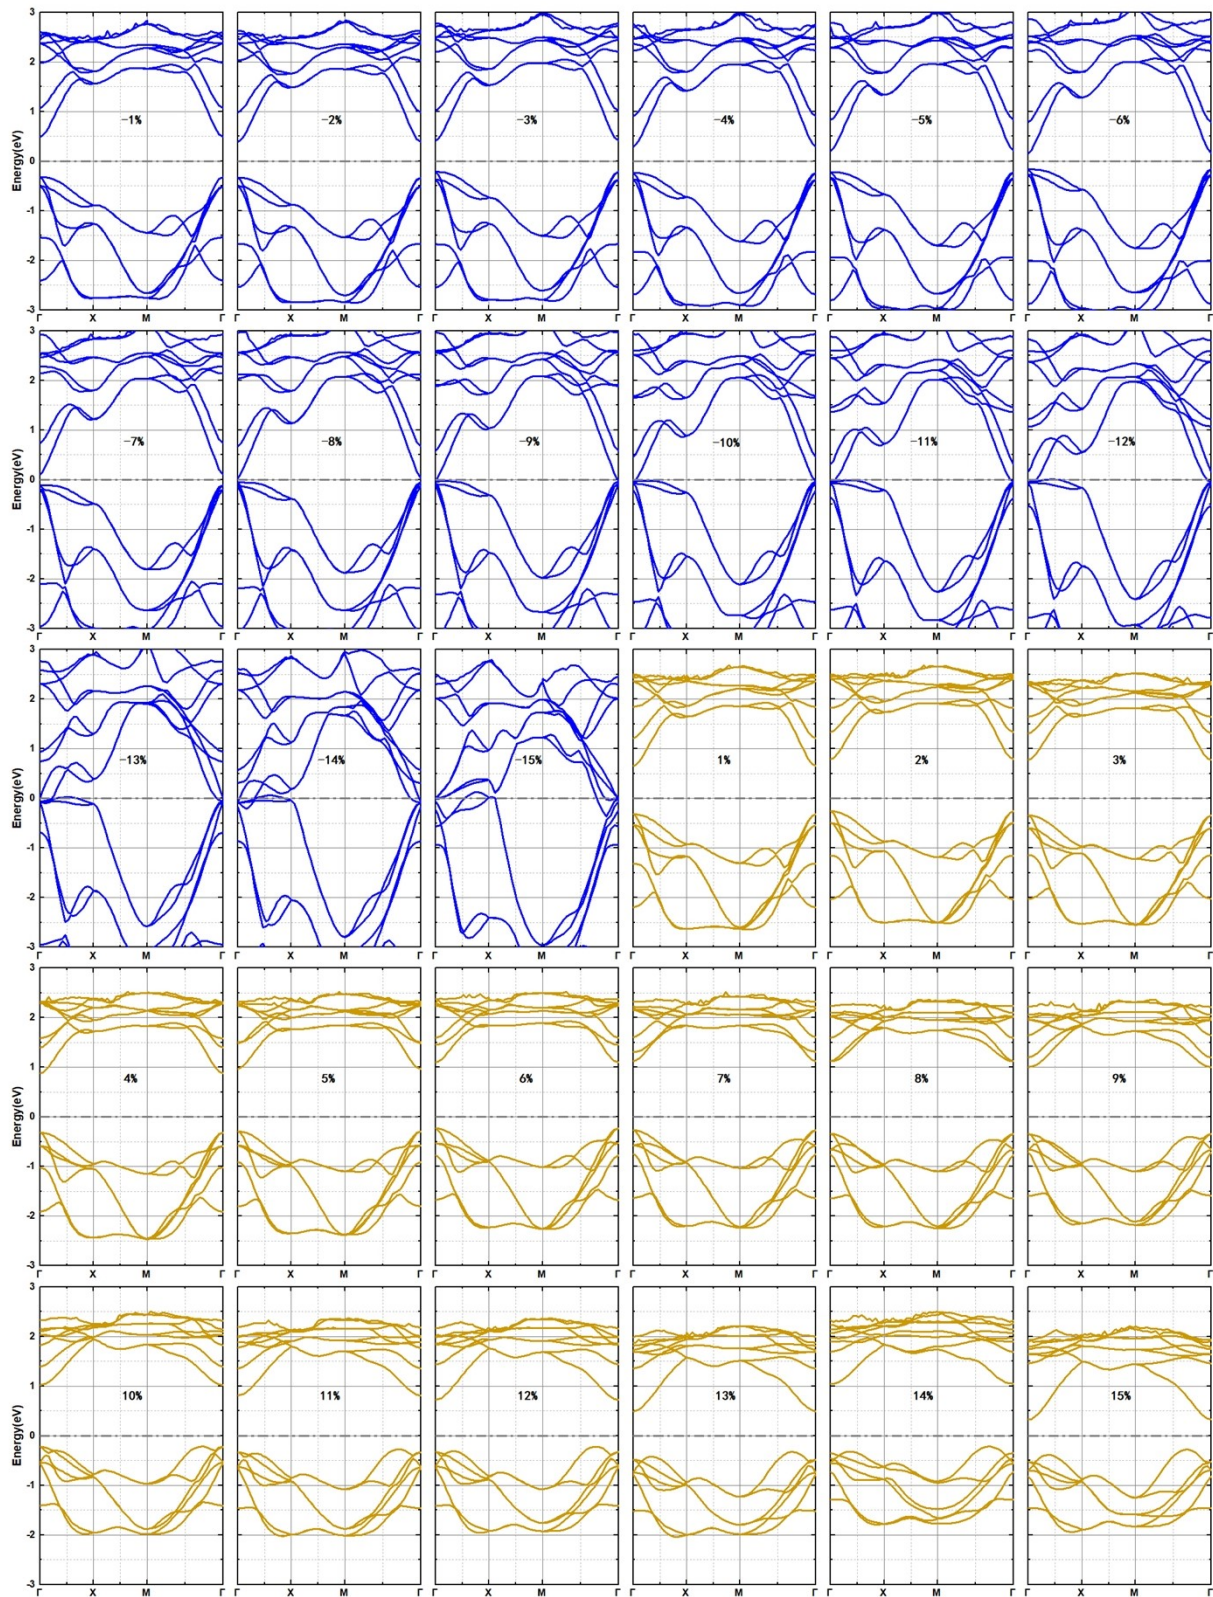

**Figure S4** The band structure evolution of ThOTe monolayer under different strains. The energy at the Fermi level is set to zero.



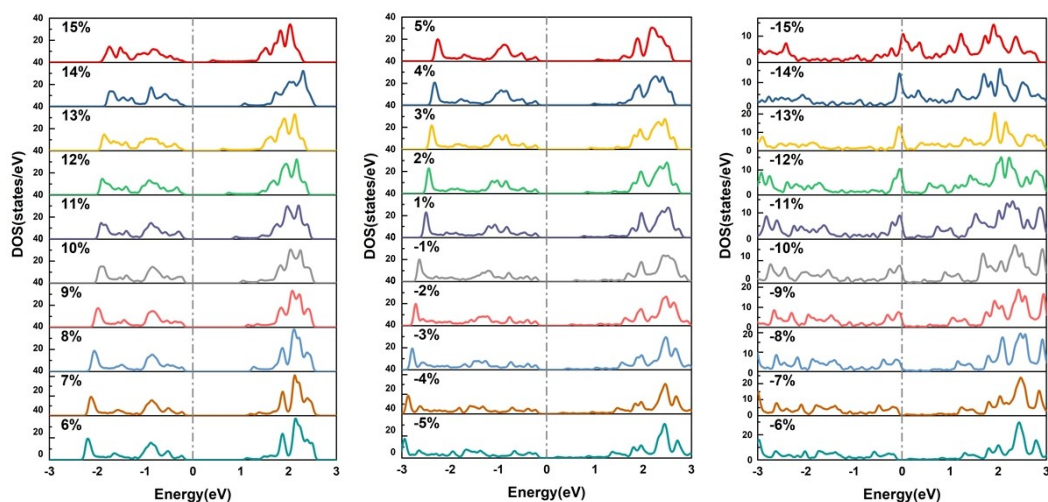

**Figure S5** The evolution of Density of states in ThOTe lattice under different strains. The energy at the Fermi level is set to zero.

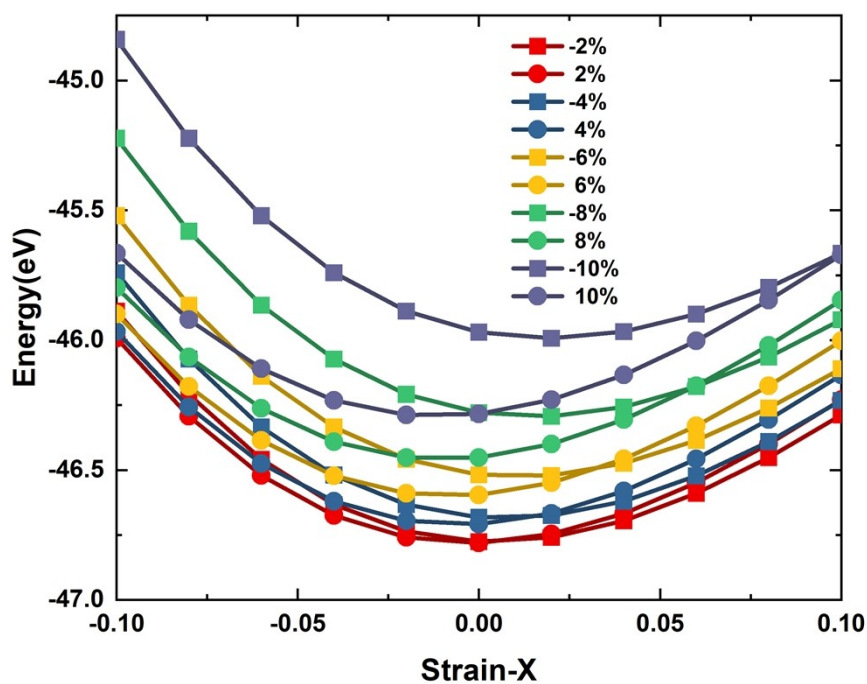

**Figure S6** Energy in a monolayer ThOTe lattice at different strains in biaxial, respectively.

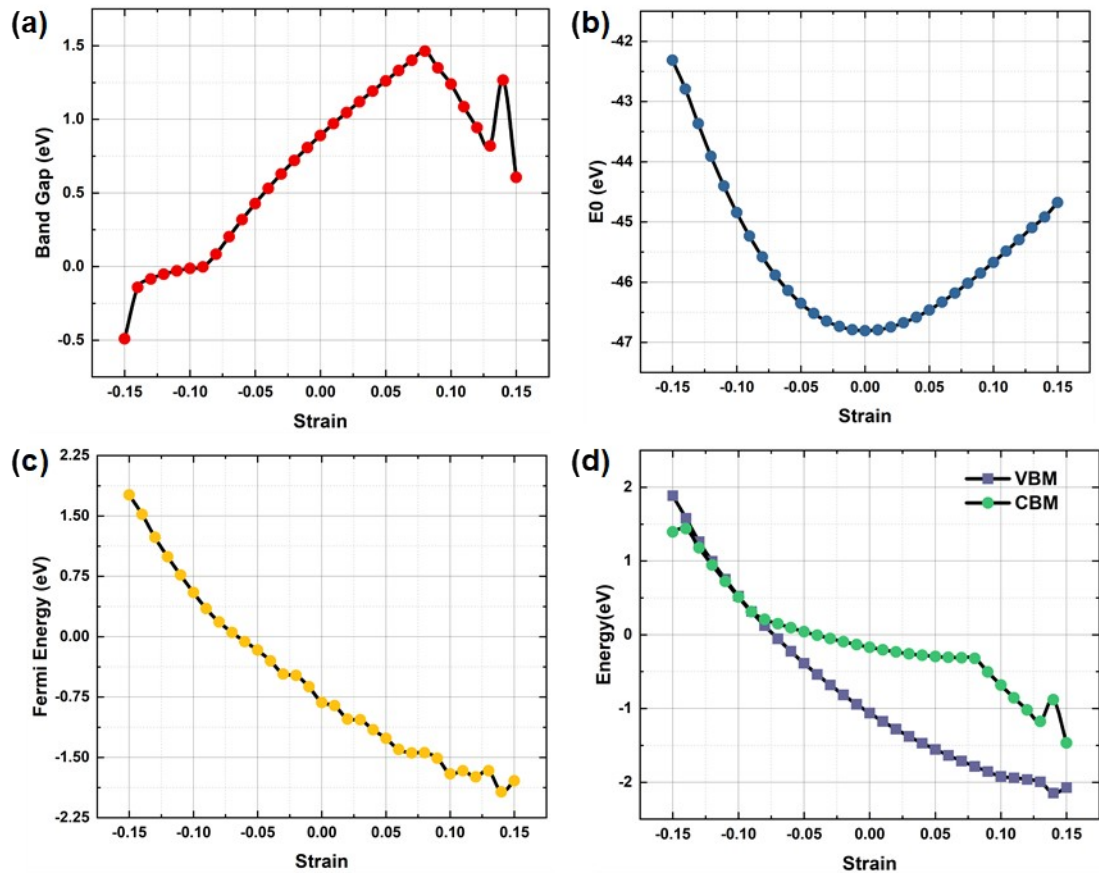

**Figure S7** The evolution of (a) band gap, (b) energy, (c) Fermi level and (d) the locations of the valence band maximum (VBM) and the conduction band minimum (CBM) under different strains.

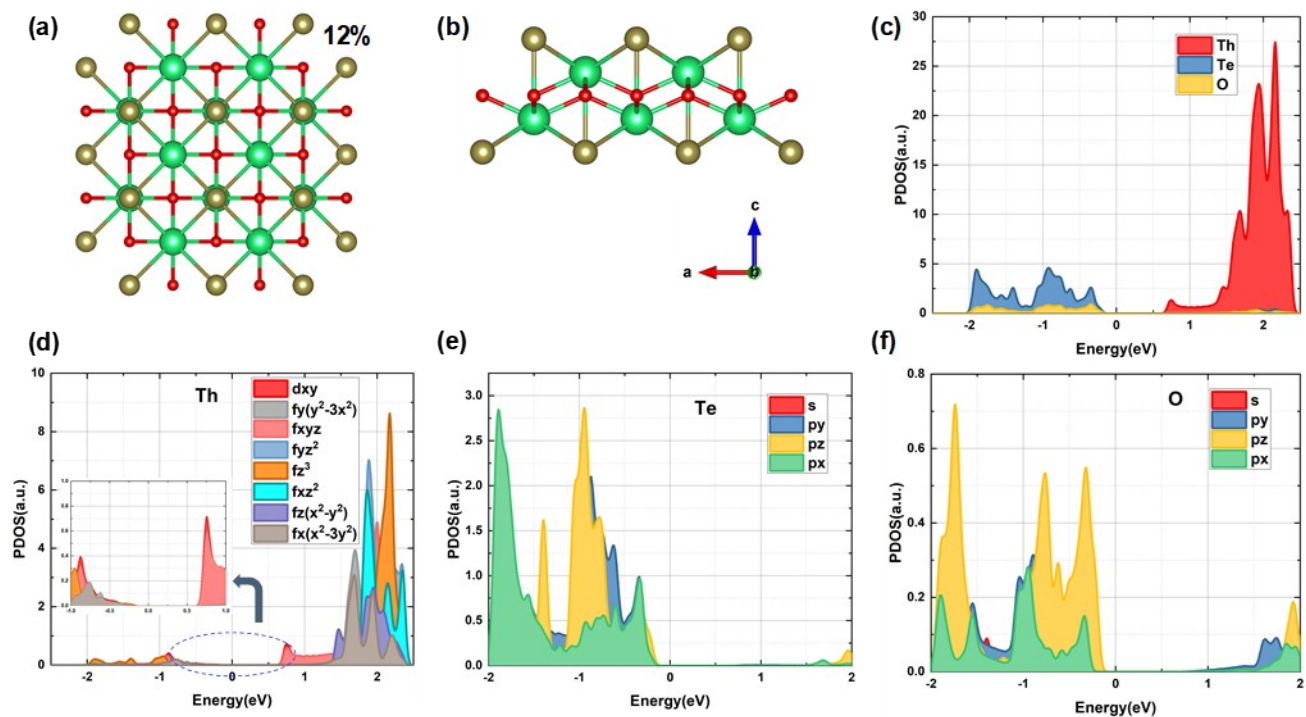

**Figure S8** (a) and (b) represent the top and side views of ThOTe monolayer with 12% strain, respectively. The green, brown and red spheres represent the Th, Te and O atoms, respectively. (c) ~ (f) Electron density of states projected onto different atoms and atomic orbitals of Th, Te and O atoms.

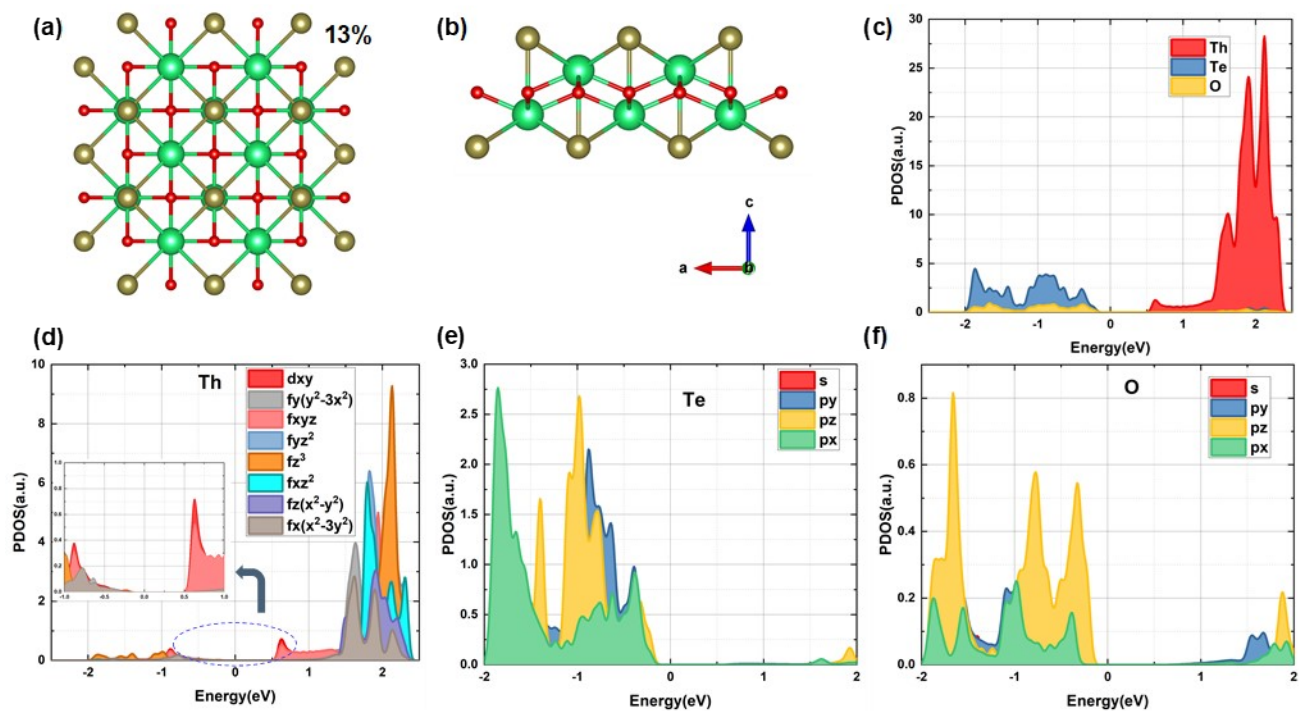

**Figure S9** (a) and (b) represent the top and side views of ThOTe monolayer with 13% strain, respectively. The green, brown and red spheres represent the Th, Te and O atoms, respectively. (c) ~ (f) Electron density of states projected onto different atoms and atomic orbitals of Th, Te and O atoms.



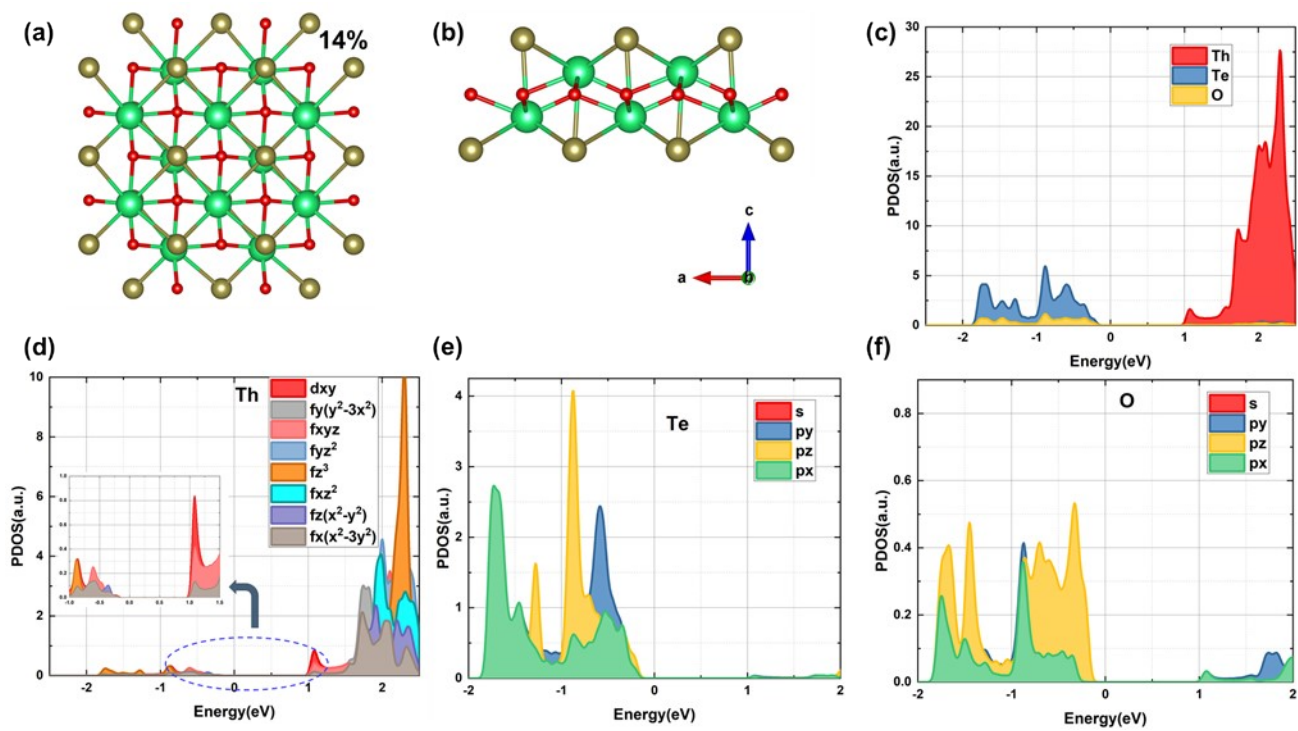

**Figure S10** (a) and (b) represent the top and side views of ThOTe monolayer with 14% strain, respectively. The green, brown and red spheres represent the Th, Te and O atoms, respectively. (c) ~ (f) Electron density of states projected onto different atoms and atomic orbitals of Th, Te and O atoms.

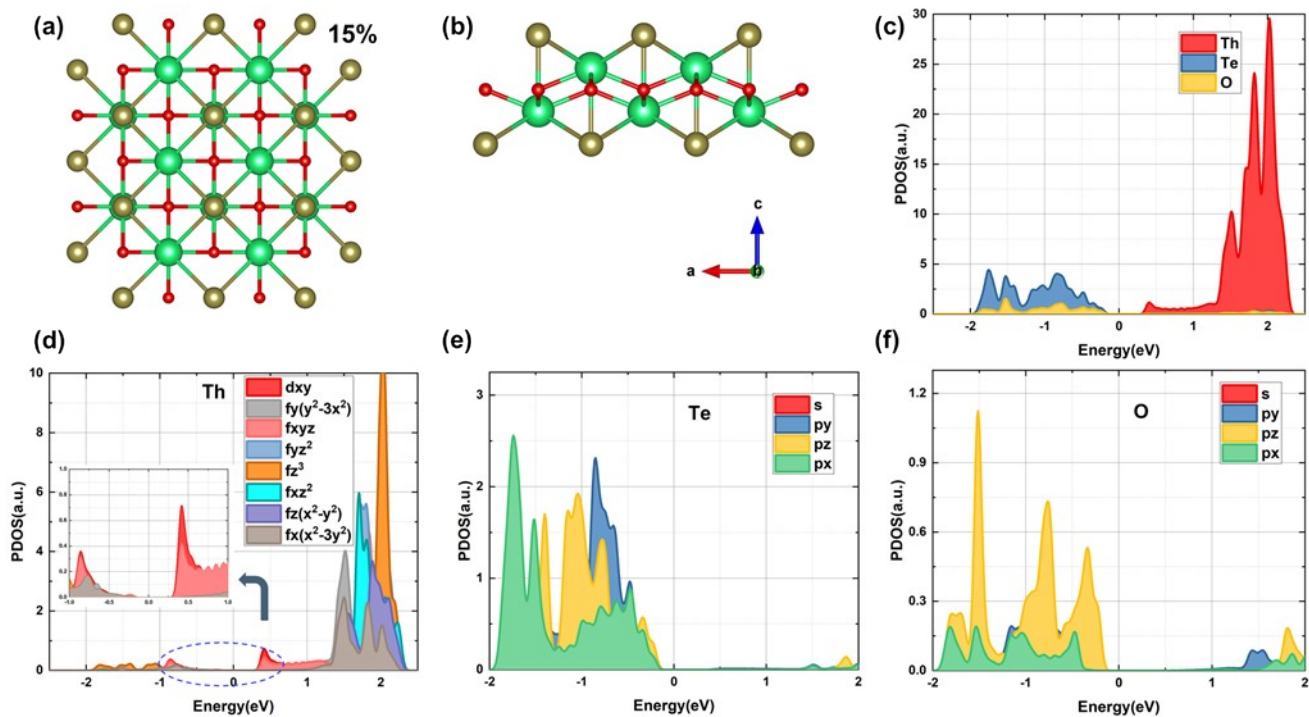

**Figure S11** (a) and (b) represent the top and side views of ThOTe monolayer with 15% strain, respectively. The green, brown and red spheres represent the Th, Te and O atoms, respectively. (c) ~ (f) Electron density of states projected onto different atoms and atomic orbitals of Th, Te and O atoms.

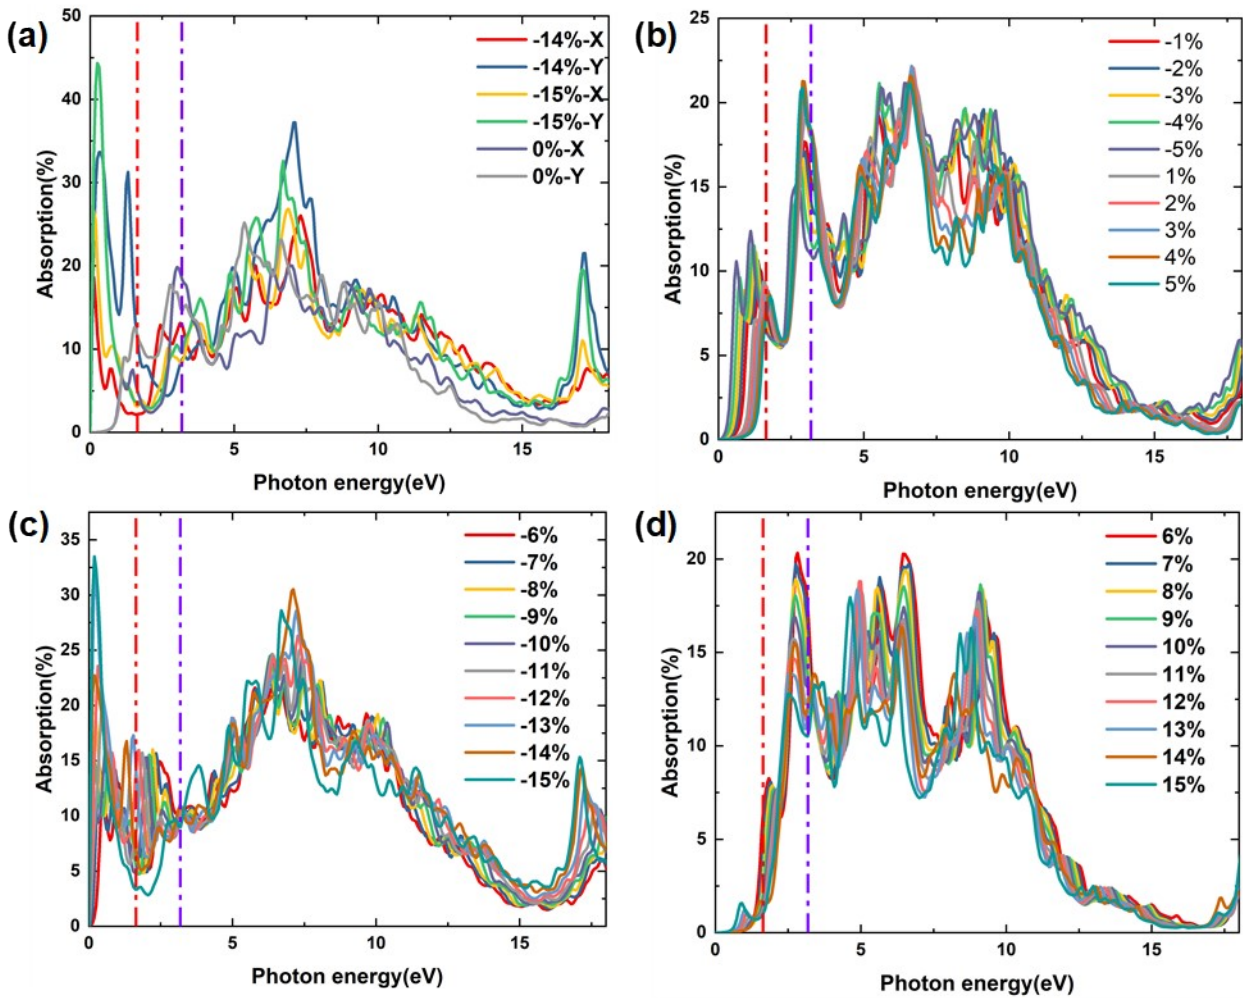

**Figure S12** The photon energy absorption coefficients of ThOTe under different strains. (a) The x and y directions photon energy absorption coefficients of ThOTe under no strain, 14%, and 15% compressive strains. (b) The average photon energy absorption coefficients of ThOTe under 1%-5% tensile and compressive strains. (c) The average photon energy absorption coefficients of ThOTe under 6%-15% compressive strains. (d) The average photon energy absorption coefficients of ThOTe under 6%-15% tensile strains.

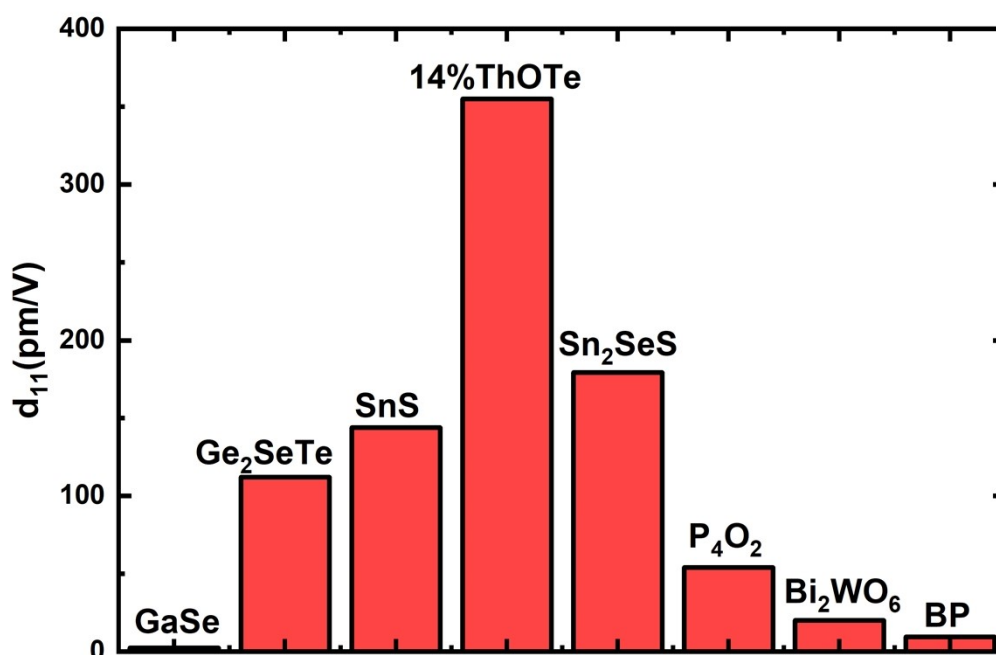

**Figure S13**  $d_{11}$  of ThOTe at 14% strain and some other 2D materials by DFT calculation. [1-5]

## References

- [1] R. Gao, Y. Gao, Piezoelectricity in two-dimensional group III–V buckled honeycomb monolayers, *Phys. Status Solidi RRL* 2017;113:1600412. [https://doi.org/https://doi.org/10.1002/pssr.201600412](https://doi.org/10.1002/pssr.201600412).
- [2] L.B. Drissi, S. Sadki, K. Sadki, Phosphorene under strain:electronic, mechanical and piezoelectric responses, *J. Phys. Chem. Solids* 2018;112:137-142. [https://doi.org/https://doi.org/10.1016/j.jpcs.2017.09.017](https://doi.org/10.1016/j.jpcs.2017.09.017).
- [3] H. Djani, P. Hermet, P. Ghosez, First-Principles Characterization of the P21ab Ferroelectric Phase of Aurivillius Bi<sub>2</sub>WO<sub>6</sub>, *The Journal of Physical Chemistry C* 2014;11825:13514-13524. <https://doi.org/10.1021/jp504674k>.

- [4] J. Qiu, F. Zhang, H. Li, X. Chen, B. Zhu, H. Guo, Z. Ding, J. Bao, J. Yu, Giant Piezoelectricity of Janus  $M_2SeX$  ( $M = Ge, Sn$ ;  $X = S, Te$ ) Monolayers, *IEEE Electron Device Lett.* 2021;424:561-564. <https://doi.org/10.1109/led.2021.3056886>.
- [5] W. Li, J. Li, Piezoelectricity in two-dimensional group-III monochalcogenides, *Nano Res.* 2015; 812:3796-3802. <https://doi.org/10.1007/s12274-015-0878-8>.
